# Supplementary material for: 2Ch–2N square and hexagon interactions: a combined crystallographic data analysis and computational study
Source: Royal Society of Chemistry journal article supplement (doi:10.1039/c9cp04562g), 2019-01-01
Supplement: c9cp04562g1.pdf [file c9cp04562g1.pdf]

## Electronic Supplementary Information (ESI)

### **2Ch-2N square and hexagon interactions: a combined crystallographic data analysis and computational study**

Yunxiang Lu,<sup>\*a</sup> Wenxia Li,<sup>a</sup> Weiwei Yang,<sup>a</sup> Zhengdan Zhu,<sup>b</sup> Zhijian Xu<sup>b</sup> and Honglai Liu<sup>a</sup>

<sup>a</sup> *Key Laboratory for Advanced Materials and Department of Chemistry, East China University of Science and Technology, Shanghai 200237, China. E-mail: yxlu@ecust.edu.cn*

<sup>b</sup> *Drug Discovery and Design Center, Shanghai Institute of Materia Medica, Chinese Academy of Sciences, Shanghai, 201203, China*

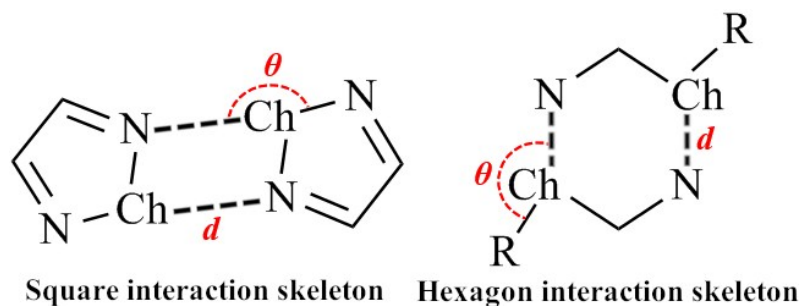

**Fig. S1** The skeletons used in the CSD survey. For the skeleton of hexagon interactions, the R, Ch, C and N atoms are all in the rings.

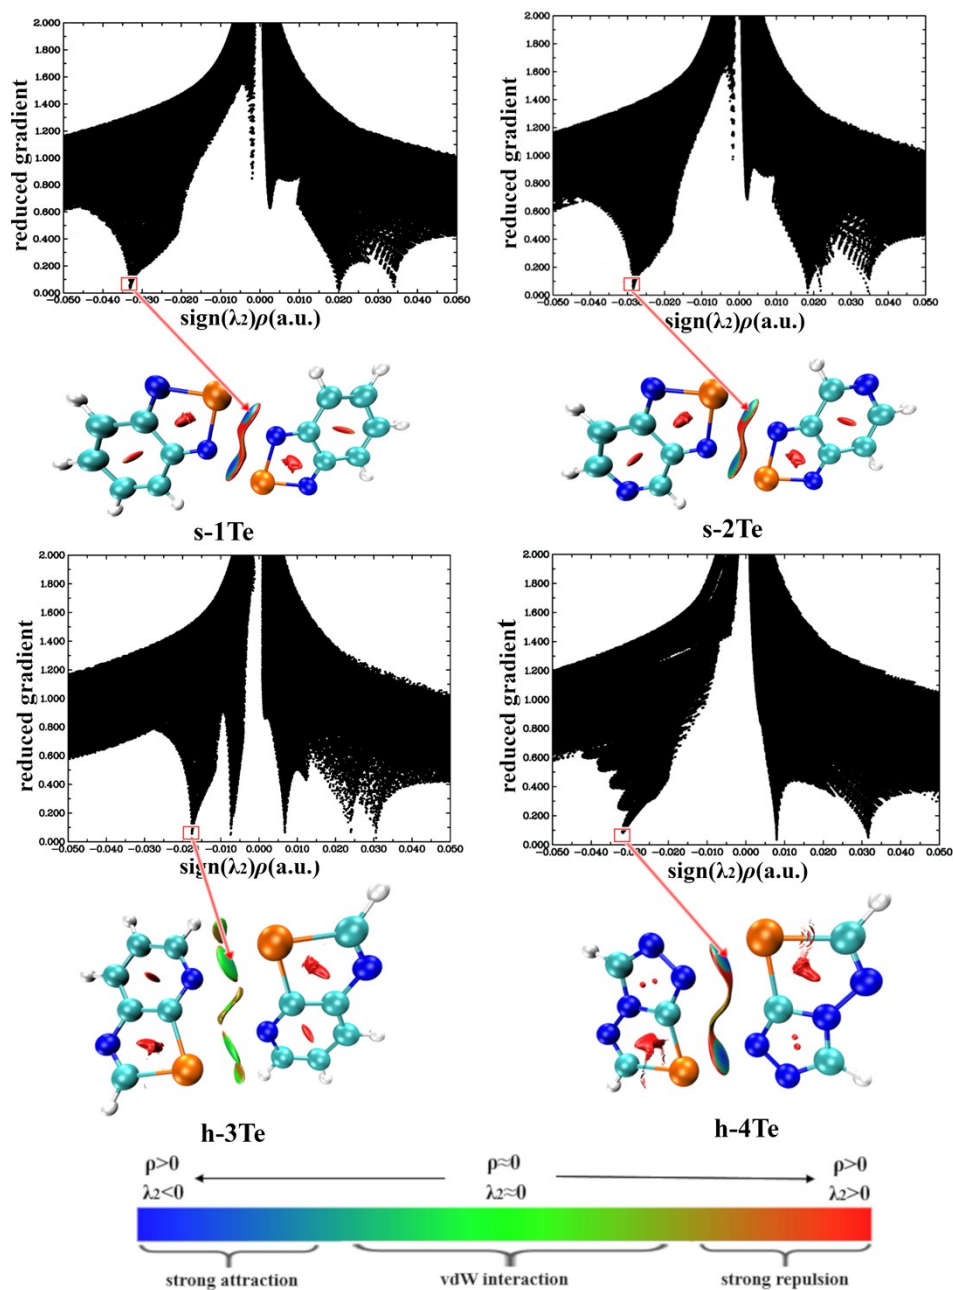

**Fig. S2** NCI isosurfaces and plots of  $s$  versus  $\rho$  multiplied by the sign of  $\lambda_2$  for the four selected dimers.

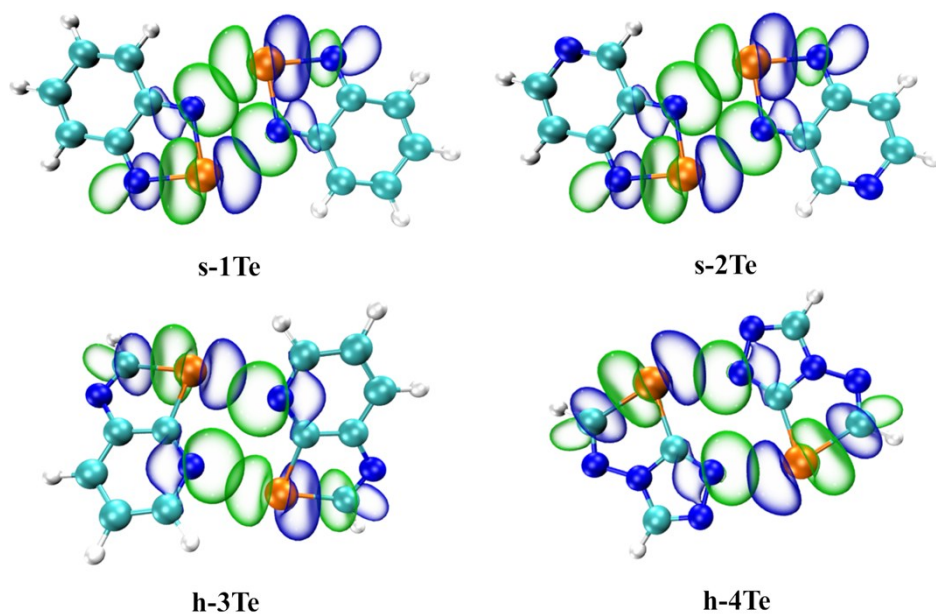

**Fig. S3** NBO plots for the four selected dimers.

**Table S1.** The NBO values of  $E^{(2)}$  (kcal/mol) for the four selected dimers<sup>a</sup>

| Dimers       | donor | acceptor  | $E^{(2)}$ |
|--------------|-------|-----------|-----------|
| <b>s-1Te</b> | LP(N) | BD*(N-Te) | 14.98     |
| <b>s-2Te</b> | LP(N) | BD*(N-Te) | 12.19     |
| <b>h-3Te</b> | LP(N) | BD*(C-Te) | 5.17      |
| <b>h-4Te</b> | LP(N) | BD*(C-Te) | 14.18     |

<sup>a</sup>LP represents the lone pair orbital, and BD\* denotes the anti-bonding orbital.

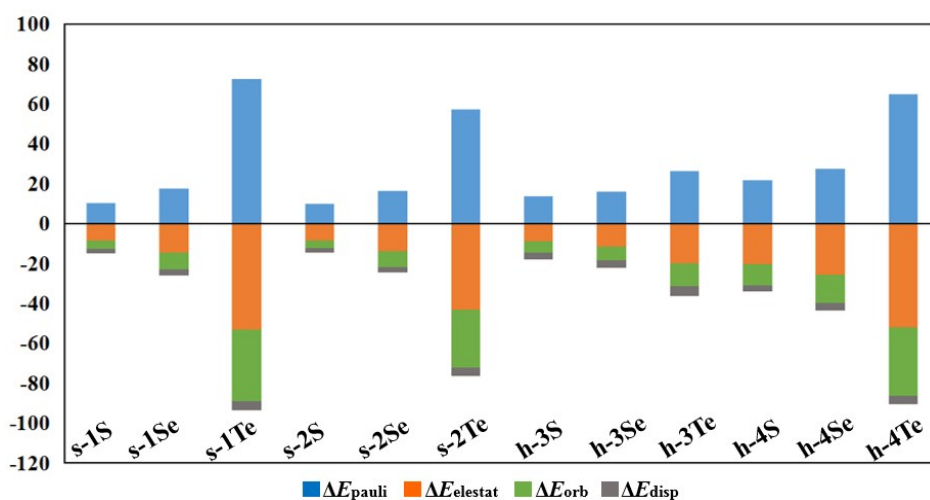

**Fig. S4** The four components of the binding energies obtained by the EDA scheme for the twelve dimers. The scales are given in kcal/mol.

**Table S2.** EDA results for the dimers under study<sup>a</sup>

| Dimers                       | $\Delta E_{\text{Total}}$ | $\Delta E_{\text{Pauli}}$ | $\Delta E_{\text{elestat}}$ | $\Delta E_{\text{orb}}$ | $\Delta E_{\text{disp}}$ |
|------------------------------|---------------------------|---------------------------|-----------------------------|-------------------------|--------------------------|
| <b>The dimers of 1 and 2</b> |                           |                           |                             |                         |                          |
| s-1S                         | -4.61                     | 10.22                     | -8.58 (57.9%)               | -3.93 (26.5%)           | -2.32 (15.6%)            |
| s-1Se                        | -8.38                     | 17.50                     | -14.65 (56.6%)              | -8.24 (31.8%)           | -2.99 (11.6%)            |
| s-1Te                        | -21.21                    | 72.30                     | -53.03 (56.7%)              | -36.04 (38.5%)          | -4.44 (4.7%)             |
| s-2S                         | -4.81                     | 9.73                      | -8.49 (58.4%)               | -3.77 (25.9%)           | -2.28 (15.7%)            |
| s-2Se                        | -8.31                     | 16.24                     | -13.90 (56.6%)              | -7.73 (31.5%)           | -2.92 (11.9%)            |
| s-2Te                        | -19.27                    | 57.13                     | -43.05 (56.3%)              | -29.04 (38.0%)          | -4.31 (5.6%)             |
| <b>The dimers of 3 and 4</b> |                           |                           |                             |                         |                          |
| h-3S                         | -4.48                     | 13.58                     | -8.96 (49.6%)               | -5.56 (30.8%)           | -3.54 (19.6%)            |
| h-3Se                        | -6.21                     | 15.94                     | -11.38 (51.4%)              | -6.86 (31.0%)           | -3.91 (17.7%)            |
| h-3Te                        | -9.82                     | 26.43                     | -19.78 (54.6%)              | -11.54 (31.8%)          | -4.93 (13.6%)            |
| h-4S                         | -12.11                    | 21.83                     | -20.15 (59.4%)              | -10.62 (31.3%)          | -3.17 (9.3%)             |
| h-4Se                        | -16.08                    | 27.27                     | -25.45 (58.7%)              | -14.34 (33.1%)          | -3.56 (8.2%)             |
| h-4Te                        | -25.52                    | 64.98                     | -51.96 (57.4%)              | -34.16 (37.7%)          | -4.38 (4.8%)             |

<sup>a</sup>All values are given in kcal/mol.

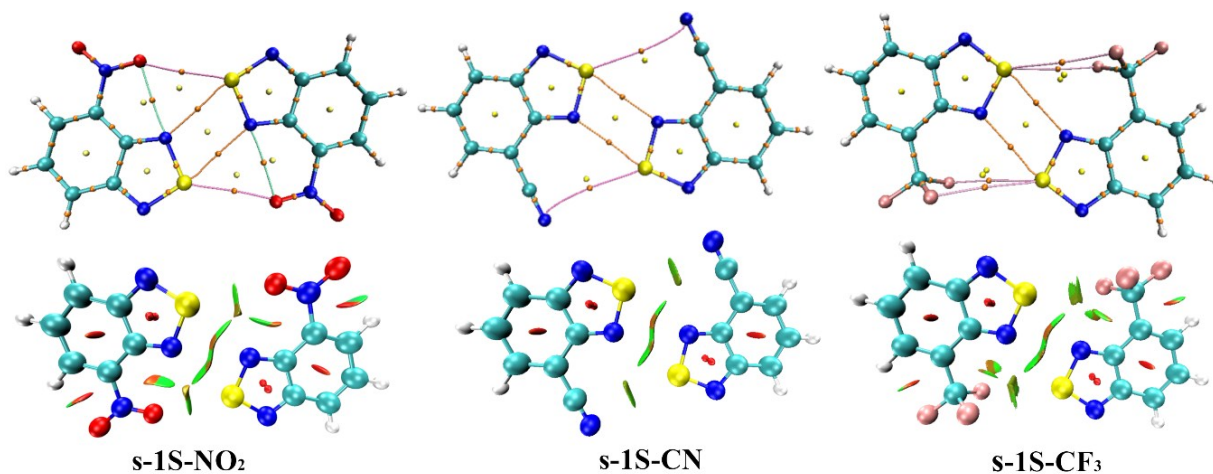**Fig. S5** The AIM graphs (above) and NCI isosurfaces (below) for the three selected dimers.

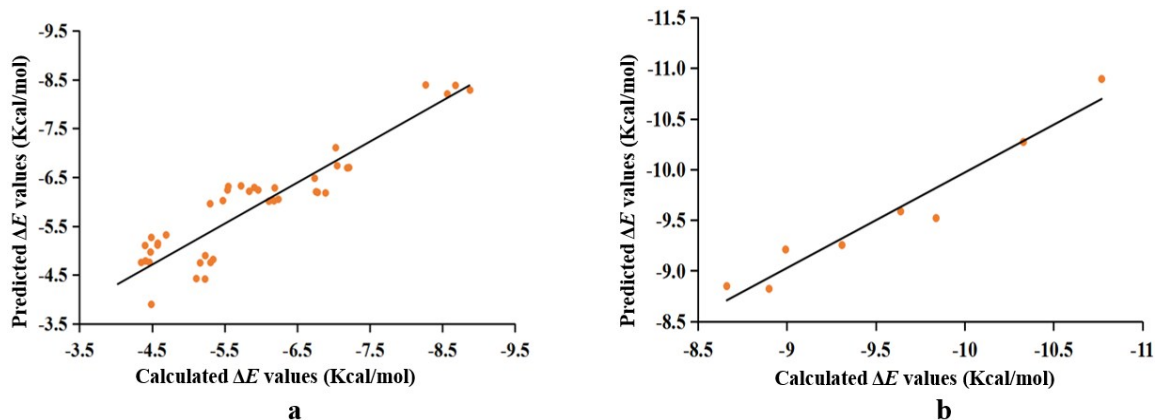

**Fig. S6** Plots of the binding energies calculated with the M06-2x-D3 method versus those predicted by Equation 1 (a) and Equation 2 (b).

## The results of the CSD search

### (1) The crystal structures containing 2Ch-2N square interaction motifs

#### a. The skeleton of the dimer of 1

|          |          |          |          |          |
|----------|----------|----------|----------|----------|
| ACEDEU   | ELITAW   | IFOGAM   | NABSIV   | SAXPOW07 |
| ACIQUB   | ESUYEW   | IJAZOK   | NABSOB   | SAYKIN   |
| AMBRCD   | EXADUE   | IJOBOZ   | NABSUH   | SAYKOT   |
| ANQSDZ   | FEBYAO   | IJOVEK   | NANPAW   | SIDKEY   |
| ANQTDZ   | FELPUH   | IMUTEQ   | NANPEA   | SIWMAO   |
| AREGOU   | FEYMUT   | IMUTEQ01 | NANQUR   | TUFJUA   |
| AROPII   | FIJSAV   | IMUTOA   | NAVPOS   | UJIWEQ01 |
| ASIQAU   | FITKOK   | JIBWAV   | NEVXOB   | ULUJES   |
| BEVPEZ   | FITKUQ   | JIBWEZ   | NONZIZ   | UQISOE   |
| BEVPID   | FITLAX   | JIBWOJ   | NUDCAR   | USALOR   |
| BEVPOJ   | FODKOA   | JIBWUP   | NUFDAT   | USALUX   |
| BEVPUP   | FODKOA01 | JIWTUH   | NUTCIQ   | USAMAE   |
| BEVQAW   | FODLIV   | JIWVAP   | NUTCOW   | USAMEI   |
| BEVQEA   | FODMAO   | JIWVIX   | NUTDAJ   | USANOT   |
| BIGLIO   | FODMAO01 | JIWWEU   | OGUYUK   | USANUZ   |
| BURTIT   | FOZTAR   | JIWWOE   | ONINIJ   | USAPAH   |
| BURTIT01 | FOZTAR01 | JIXFEE   | OVIWOH   | USAPEL   |
| CANQTZ   | FOZTEV   | JIXFOO   | OVIXIC   | UYIVAB   |
| CEDXOB   | FOZTIZ   | JIXFUU   | OXAZIY   | UYUSEO   |
| CEZFUL   | GAJQIU   | JOTPAL   | OXAZOE   | UZANAM   |
| CIGYAV   | GAJQUG   | JUQTEW   | PATWOZ   | UZAQAP   |
| COFMUF10 | GAJLAN   | JURLAJ   | PEZBAZ   | UZEMOD   |
| COGTIB   | GAJRER   | KAZNOQ   | PIFNIC   | UZEMUJ   |
| COWNEJ01 | GAJRIV   | KESREI   | POFGIB   | VAMMIH   |
| COWNOT   | GAJROB   | KESROS   | QARSEI01 | VEHVIQ   |

|        |          |         |          |         |
|--------|----------|---------|----------|---------|
| DAVRAW | GAJRUH   | KIBVEY  | QIBREB   | VEHVUC  |
| DAVRIE | GAJSAO   | KIGHUG  | QIBROL   | VEKYO A |
| DAVSEB | GAJSAO01 | KODXEI  | QIJWOY   | WEBLUM  |
| DEBHEY | GAJSIW   | KODXIM  | QOGPIL   | WESYAX  |
| DEBHIC | GAJSOC   | KODXOS  | QOKVUJ   | XADWAD  |
| DEBHOI | GASDUC   | LEKLAR  | QUGDIH   | XIDGOI  |
| DEXTEI | GASFAK   | LISYIY  | RAGXEF   | YAKZAO  |
| DIVSOT | GASFEO   | LISYOE  | REYAT    | YEVWAA  |
| DIVSUZ | GINTII   | MELCAK  | RUPPEY   | YEVWII  |
| DIVTAG | GIRFAQ   | MELCEO  | RUTYUC   | YIWLOG  |
| DIVTEK | HARCIO   | MOPHO O | SAXPOW   | YULXIN  |
| DIVTUA | HARCOU   | NABRAM  | SAXPOW01 | ZIJRIV  |
| DIVZUG | HIWHAY   | NABREQ  | SAXPOW02 | ZIJROB  |
| DIWPAP | HUDHUL   | NABROA  | SAXPOW03 | ZUCDIM  |
| DORZOA | HULHIF   | NABRUG  | SAXPOW04 | ZUCLEQ  |
| EGOQAU | HULHIF01 | NABSAN  | SAXPOW05 | ZUFKIW  |
| EJIYED | HUYMUL   | NABSER  | SAXPOW06 |         |

**b. The skeleton of the dimer of 2**

|        |        |        |        |        |
|--------|--------|--------|--------|--------|
| BAYNEX | GIPDER | UXINIZ | WEJYER | WEJZAO |
| CEWWOS | GIPDIV | ROJSAK | WEJYIV |        |
| CEWXAF | LIZPAM | ROJSEO | WEJYOB |        |
| GIPDAN | POMVEU | WEJXUG | WEJYUH |        |

**c. Other skeletons**

|          |        |        |          |        |
|----------|--------|--------|----------|--------|
| AHIKEJ   | CEJPAI | IVECAN | NEXPEL   | TABXEZ |
| AREGEK   | DPSEAZ | KANVAX | NIGLUM   | TEGMOJ |
| AREGEK01 | EFIWOG | KOZJEO | PIVWUM01 | TEGNAW |
| BAPREQ   | EKEKOU | KOZJIS | POYKOD   | TEGNEA |
| BIBCUL   | GUKWUE | LAMLOC | RIJNAB   | WEJXEQ |
| BIMLAK   | HAMFOS | MUDCAQ | SOTQUP   |        |

**(2) The crystal structures containing 2Ch-2N hexagon interaction motifs**

**a. The skeleton of the dimer of 3**

|        |        |        |        |        |
|--------|--------|--------|--------|--------|
| AKOQEY | BEYGEU | BEYHAR | BEYJAT | KAWCAP |
| BEYFOD | BEYHOF | BEYGUK | BEYGOE | PIHJAT |
| BEYGAQ | BEYHIZ | BEYHEV | BEYJEX |        |

**b. The skeleton of the dimer of 4**

|        |        |        |        |        |
|--------|--------|--------|--------|--------|
| CINRAV | GIGRAQ | MPTZTD | URAQIO | YAXSUN |
| CINREZ | GUVHOV | OWEDEA | UXIPOI | YESBAA |
| CICNOS | HODNOE | SAPRAD | VAHGUH | YIRHEN |
| GAJCOM | HOWMUD | TELLEB | WAWPIU |        |
| GAJDAZ | KAZQUZ | TOMRAQ | WUDXID |        |
| GAJDED | MODTUV | ULAREG | XERZUQ |        |

**c. Other skeletons**

|          |          |          |          |          |
|----------|----------|----------|----------|----------|
| NIPYUJ   | FEFCID   | NEWYIX   | SAXPOW06 | WAGJOF01 |
| AHOVID   | FILHOA   | OHALAM   | SAXPOW07 | WAGJOF02 |
| AHOVID01 | FINLEU   | PAWCIB   | SOLRUI   | WEVZEC   |
| BAHBOD   | FUCMUL   | PENXIQ   | TAXZEZ   | WIPJOW   |
| BEZQAZ   | HAJZUQ   | QONJAF   | TEYZUS   | XARHII01 |
| BEZQAZ01 | HEMXEC   | QUDSOX   | TICNEY   | XINCEC   |
| BEZQAZ02 | HULGOK   | SAXPOW   | TUFCAY   | XINCEC01 |
| BEZQAZ03 | IMTZBI   | SAXPOW01 | TUGGIL   | XOQHER   |
| COSLOL   | MBTHFX   | SAXPOW02 | TUGGIL01 | XURJUP   |
| DILCUY   | METROT   | SAXPOW03 | TZBZTZ   | YOBZOG   |
| FAMWUL   | NEWYET   | SAXPOW04 | VACMAN   | ZAPRAM   |
| FAMXAS   | NEWYET01 | SAXPOW05 | WAGJOF   | ZOPGOA   |
